# Supplementary material for: Synthesis and characterization of photoluminescent vinylbiphenyl decorated polyhedral oligomeric silsesquioxanes
Source: Royal Society of Chemistry journal article supplement (doi:10.1039/b814496f), 2008-12-11

## Supplementary Information

### Synthesis and characterization of photoluminescent vinylbiphenyl decorated Polyhedral Oligomeric Silsesquioxane

Nicolas R. Vautravers, Pascal André and David J. Cole-Hamilton

X-Ray crystal structure of **H3**

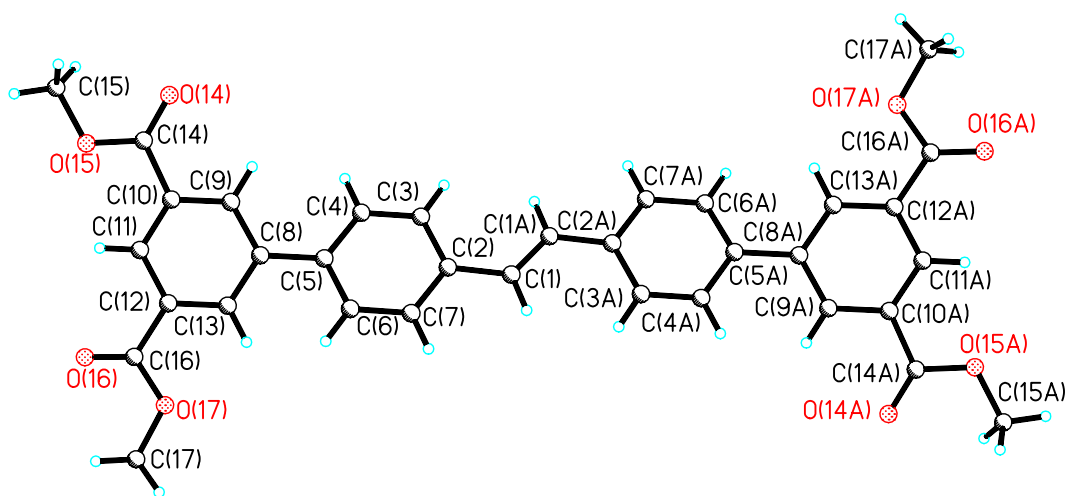

Supplement: b814496f.pdf [file b814496f.pdf]
